# Supplementary material
Source: MDPI journal article supplement (https://www.mdpi.com/2673-6497/3/2/26)
Supplement: s1 [file s1]

## Supplementary Material

# Compressing the Channels in the Crystal Structure of Copper Squarate Metal-Organic Framework

Francisco Colmenero <sup>1,2,\*</sup>, Alvaro Lobato <sup>1</sup>, Vicente Timón <sup>2</sup>

<sup>1</sup> Departament of Chemical-Physics, Facultad de Ciencias Químicas, Universidad Complutense de Madrid, 28040 Madrid, Spain

<sup>2</sup> Instituto de Estructura de la Materia, Consejo Superior de Investigaciones Científicas, 28006 Madrid, Spain

\* Correspondence: [francolm@ucm.es](mailto:francolm@ucm.es)

| Contents:                                                                                         | Page |
|---------------------------------------------------------------------------------------------------|------|
| (1) Table S1. Interatomic distances in copper squarate                                            | S.2  |
| (2) Table S2. Interatomic angles in copper squarate                                               | S.2  |
| (3) Figure S1. The coordination environment of copper atom in copper squarate.                    | S.2  |
| (4) Figure S2. X-ray powder diffraction pattern of copper squarate                                | S.3  |
| (5) Table S3. Most intense reflections in the X-ray powder diffraction pattern of copper squarate | S.4  |
| (6) Figure S3. Tridimensional representations of the mechanical properties of copper squarate     | S.5  |
| (7) Table S4. Unit cell volume and parameters of copper squarate under isotropic pressures        | S.6  |
| (8) Table S5. Calculated compressibilities of copper squarate under external isotropic pressures  | S.7  |
| (9) Figure S4. Lattice enthalpy of copper squarate as a function of the isotropic pressure.       | S.8  |
| (10) Table S6. Unit cell volume and parameters of copper squarate under uniaxial stresses         | S.9  |
| (11) Table S7. Calculated compressibilities of copper squarate under uniaxial stresses            | S.10 |
| (12) References                                                                                   | S.11 |

**Table S1.** Interatomic distances in copper squarate (in Å). The atom numbering convention used for the oxygen atoms in the coordination environment of copper atom is shown in Figure S1.

| Distance     | Exp. [1] | Calc. (PBEsol) |
|--------------|----------|----------------|
| <b>Cu-O</b>  |          |                |
| Cu-O1 × 2    | 1.893(3) | 2.022          |
| Cu-O2 × 2    | 1.945(3) | 2.043          |
| Cu-O2* × 2   | 2.412(2) | 2.329          |
| <b>Cu-Cu</b> |          |                |
| Cu-Cu(min)   | 3.289(1) | 3.216          |
| <b>C-C</b>   |          |                |
| C1-C2        | -        | 1.483          |
| C1-C2'       | -        | 1.493          |
| <C-C>        | 1.447(2) | 1.488          |
| <b>C-O</b>   |          |                |
| C1-O1        | -        | 1.242          |
| C2-O2        | -        | 1.254          |
| <C-O>        | 1.234(3) | 1.248          |

**Table S2.** Interatomic angles in copper squarate (in degrees). The atom numbering convention used for the oxygen atoms in the coordination environment of copper atom is shown in Figure S1.

| Angle               | Exp. [1]    | Calc.  |
|---------------------|-------------|--------|
| <b>O-Cu-O</b>       |             |        |
| O1-Cu-O1' (cis)     | 91.90(9)    | 88.55  |
| O1-Cu-O2' (trans)   | 177.10(11)  | 176.31 |
| O2-Cu-O2* (cis)     | 82.56.10(9) | 85.50  |
| O2*-Cu-O2*' (trans) | 167.83(8)   | 171.25 |
| <b>C-C-C</b>        |             |        |
| C1-C2-C1            | -           | 90.51  |
| C2-C1-C2            | -           | 89.49  |
| <b>C-C-O</b>        |             |        |
| O1-C1-C2            | -           | 132.12 |
| C1-C2-O2            | -           | 131.90 |

**Figure S1.** The coordination environment of copper atom in copper squarate.

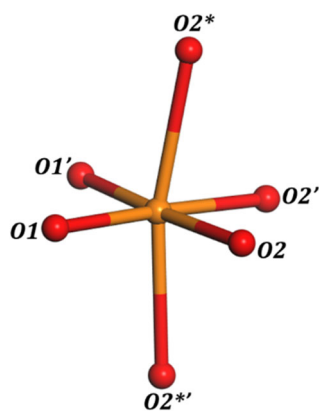

**Figure S2.** X-ray powder diffraction patterns of copper squarate generated from the computed and experimental [1] crystal structures.

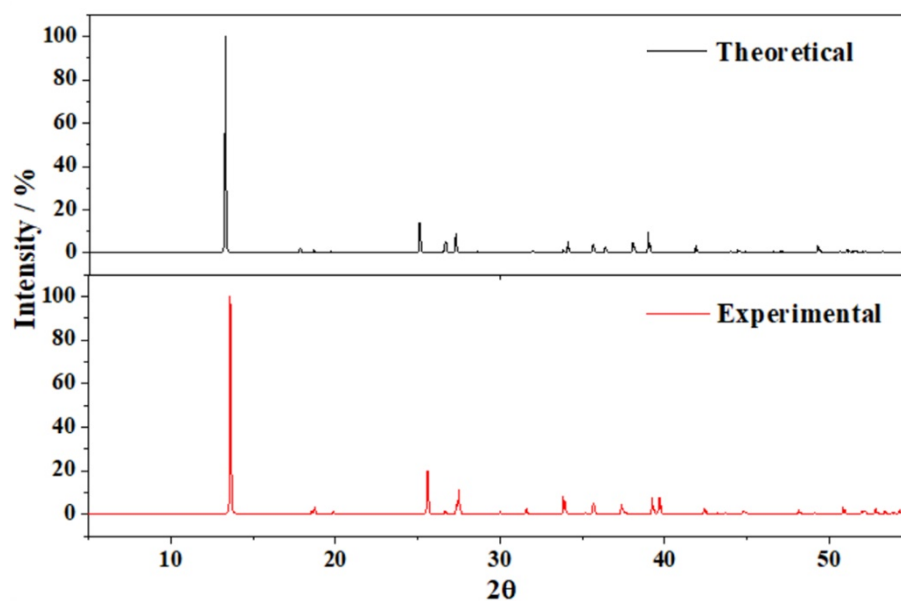

**Table S3.** Comparison of the positions and intensities of the most intense reflections in the calculated and experimental [1] X-ray powder diffraction patterns of copper squarate.

| $[h\ k\ l]$ | Exp. [1]        |         |        | Calc.           |         |        |                        |
|-------------|-----------------|---------|--------|-----------------|---------|--------|------------------------|
|             | $2\theta$ (deg) | $d$ (Å) | I (%)  | $2\theta$ (deg) | $d$ (Å) | I (%)  | $\Delta$ ( $2\theta$ ) |
| [1 1 0]     | 13.610          | 6.501   | 100.00 | 13.247          | 6.678   | 100.00 | 0.363                  |
| [1 1 1]     | 25.589          | 3.478   | 22.57  | 25.111          | 3.544   | 19.89  | 0.478                  |
| [-3 -3 1]   | 39.681          | 2.270   | 12.17  | 39.057          | 2.304   | 13.61  | 0.624                  |
| [-2 -2 1]   | 27.511          | 3.240   | 9.85   | 27.303          | 3.264   | 10.85  | 0.208                  |
| [-1 1 2]    | 33.860          | 2.645   | 9.56   | 34.141          | 2.624   | 7.72   | -0.281                 |
| [0 0 2]     | 35.677          | 2.515   | 9.05   | 35.678          | 2.515   | 9.02   | -0.001                 |
| [-4 -2 1]   | 39.255          | 2.293   | 8.22   | 38.117          | 2.359   | 8.83   | 1.138                  |
| [2 2 1]     | 37.383          | 2.404   | 6.31   | 36.421          | 2.465   | 5.81   | 0.962                  |
| [2 2 0]     | 27.417          | 3.251   | 6.24   | 26.676          | 3.339   | 7.89   | 0.741                  |
| ]3 3 1]     | 50.868          | 1.794   | 4.95   | 49.410          | 1.843   | 5.84   | 1.458                  |
| [1 1 2]     | 42.433          | 2.129   | 4.23   | 41.949          | 2.152   | 4.42   | 0.484                  |
| [2 0 0]     | 18.723          | 4.736   | 4.19   | 17.812          | 4.976   | 3.45   | 0.911                  |
| [-3 -1 1]   | 27.326          | 3.261   | 3.23   | 26.679          | 3.339   | 3.30   | 0.647                  |
| [-5 -3 1]   | 52.836          | 1.731   | 3.21   | 51.190          | 1.783   | 3.09   | 1.646                  |
| [-4 2 3]    | 54.294          | 1.688   | 2.81   | 54.604          | 1.679   | 2.53   | -0.310                 |
| [-3 3 3]    | 57.809          | 1.594   | 2.77   | 58.195          | 1.584   | 2.75   | -0.386                 |
| [-2 0 2]    | 31.600          | 2.829   | 2.65   | 31.973          | 2.797   | 1.87   | -0.373                 |
| [2 0 2]     | 48.159          | 1.888   | 2.39   | 47.121          | 1.927   | 2.31   | 1.038                  |
| [-1 3 1]    | 33.975          | 2.637   | 2.26   | 33.857          | 2.646   | 2.39   | 0.118                  |
| [-5 3 3]    | 62.641          | 1.482   | 2.26   | 62.537          | 1.484   | 1.86   | 0.104                  |
| [0 2 1]     | 26.661          | 3.341   | 2.17   | 26.547          | 3.355   | 1.29   | 0.114                  |

**Figure S3.** Elastic properties of copper squarate as a function of the orientation of the applied pressure: (A) Compressibility; (B) Young modulus; (C) Maximum shear modulus; (D) Surfaces of maximum (green) and minimum Poisson's ratio (red). Red and green colours are employed to distinguish negative and positive property values.

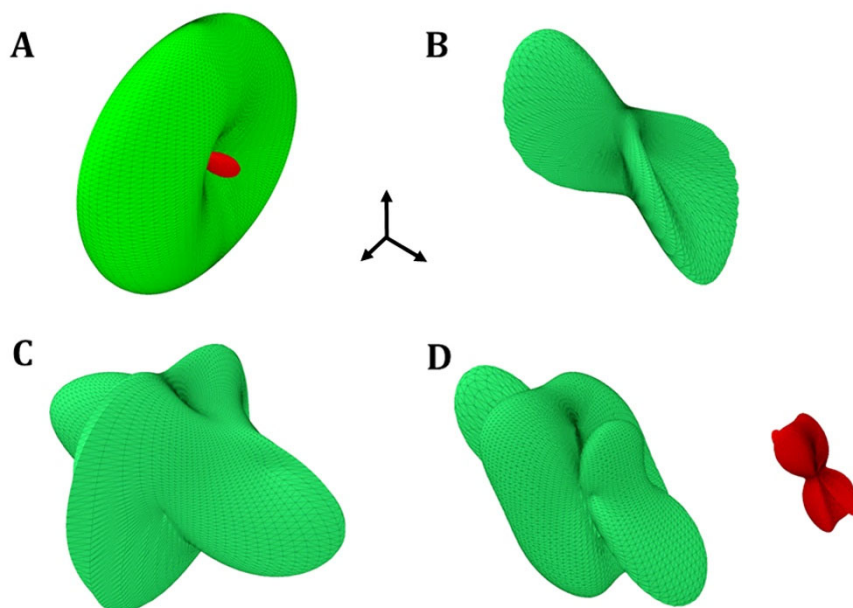

**Table S4.** Unit cell volume and lattice parameters of copper squarate under the effect of different external isotropic pressures.

| P (GPa) | Vol. (Å <sup>3</sup> ) | <i>a</i> (Å) | <i>b</i> (Å) | <i>c</i> (Å) | <i>α</i> (deg) | <i>β</i> (deg) | <i>γ</i> (deg) |
|---------|------------------------|--------------|--------------|--------------|----------------|----------------|----------------|
| -1.5001 | 562.4353               | 10.7189      | 9.6763       | 5.9286       | 90.00          | 113.84         | 90.00          |
| -1.2498 | 545.5326               | 10.7991      | 9.5624       | 5.8344       | 90.00          | 115.11         | 90.00          |
| -1.0009 | 535.8749               | 10.8442      | 9.4861       | 5.7779       | 90.00          | 115.63         | 90.00          |
| -0.7497 | 526.9435               | 10.8919      | 9.3978       | 5.7339       | 90.00          | 116.13         | 90.00          |
| -0.4993 | 520.1234               | 10.9398      | 9.3037       | 5.6928       | 90.00          | 116.15         | 90.00          |
| -0.2508 | 512.9415               | 10.9817      | 9.2187       | 5.6540       | 90.00          | 116.35         | 90.00          |
| -0.1243 | 507.1767               | 11.0353      | 9.1237       | 5.6269       | 90.00          | 116.46         | 90.00          |
| 0.0004  | 502.6355               | 11.0961      | 9.0074       | 5.6076       | 90.00          | 116.26         | 90.00          |
| 0.2493  | 497.6242               | 11.1297      | 8.9240       | 5.5811       | 90.00          | 116.14         | 90.00          |
| 0.5005  | 492.9396               | 11.1581      | 8.8690       | 5.5516       | 90.00          | 116.20         | 90.00          |
| 0.7503  | 488.3490               | 11.1865      | 8.7918       | 5.5270       | 90.00          | 116.05         | 90.00          |
| 1.0002  | 483.0001               | 11.2420      | 8.6687       | 5.4985       | 90.00          | 115.66         | 90.00          |
| 1.2507  | 468.0708               | 11.4581      | 8.2106       | 5.4560       | 90.00          | 114.23         | 90.00          |
| 1.5011  | 449.3288               | 11.6623      | 7.7077       | 5.4171       | 90.00          | 112.67         | 90.00          |
| 1.7482  | 427.0266               | 11.8435      | 7.1757       | 5.3910       | 90.00          | 111.24         | 90.00          |
| 2.0006  | 407.6974               | 11.9506      | 6.7755       | 5.3714       | 90.00          | 110.38         | 90.00          |
| 2.4994  | 399.3546               | 11.9715      | 6.6291       | 5.3557       | 90.00          | 110.02         | 90.00          |
| 3.0003  | 388.4434               | 11.9998      | 6.4473       | 5.3346       | 90.00          | 109.75         | 90.00          |
| 4.0004  | 376.5658               | 12.0362      | 6.3041       | 5.2732       | 90.00          | 109.76         | 90.00          |
| 4.9994  | 367.7653               | 12.0196      | 6.1785       | 5.2530       | 90.00          | 109.48         | 90.00          |
| 5.9996  | 361.3961               | 12.0091      | 6.0950       | 5.2309       | 90.00          | 109.28         | 90.00          |

**Table S5.** Calculated compressibilities ( $k_a = -1/a \cdot (\partial a / \partial P)_P$ ) of copper squarate for different external isotropic pressures.

| P (GPa) | $k_a(\text{TPa}^{-1})$ | P (GPa) | $k_a(\text{TPa}^{-1})$ | P (GPa) | $k_a(\text{TPa}^{-1})$ |
|---------|------------------------|---------|------------------------|---------|------------------------|
| -1.20   | -14.45                 | 0.30    | -12.09                 | 1.80    | -35.49                 |
| -1.10   | -16.29                 | 0.40    | -12.91                 | 1.90    | -29.64                 |
| -1.00   | -18.66                 | 0.50    | -10.82                 | 2.00    | -16.26                 |
| -0.90   | -19.61                 | 0.60    | -7.59                  | 2.10    | -7.60                  |
| -0.80   | -18.70                 | 0.70    | -6.45                  | 2.20    | -3.37                  |
| -0.70   | -16.54                 | 0.80    | -10.88                 | 2.40    | -4.19                  |
| -0.60   | -14.41                 | 0.90    | -23.34                 | 2.60    | -4.65                  |
| -0.50   | -13.85                 | 1.00    | -44.10                 | 2.80    | -4.79                  |
| -0.40   | -16.18                 | 1.10    | -62.48                 | 3.00    | -4.64                  |
| -0.30   | -22.20                 | 1.20    | -74.16                 | 3.20    | -4.22                  |
| -0.20   | -31.66                 | 1.30    | -80.56                 | 3.40    | -3.58                  |
| -0.10   | -42.96                 | 1.40    | -80.47                 | 3.60    | -2.76                  |
| 0.00    | -21.53                 | 1.50    | -73.79                 | 3.80    | -1.82                  |
| 0.10    | -9.07                  | 1.60    | -61.79                 | 4.00    | -0.81                  |
| 0.20    | -9.22                  | 1.70    | -47.40                 | 4.20    | 0.20                   |

**Figure S4.** Lattice enthalpy of copper squarate as a function of the isotropic pressure.

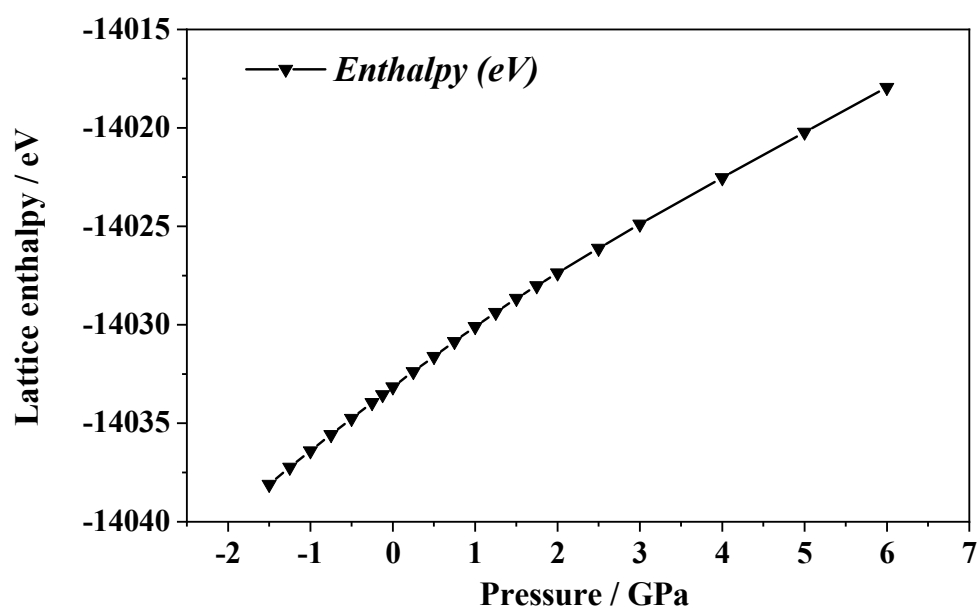



**Table S6.** Unit cell volume and lattice parameters of copper squarate under the effect of different external uniaxial stresses applied along the direction of minimum compressibility.

| <b>P (GPa)</b> | <b>Vol. (Å<sup>3</sup>)</b> | <b>a (Å)</b> | <b>b (Å)</b> | <b>c (Å)</b> | <b><math>\alpha</math> (deg)</b> | <b><math>\beta</math> (deg)</b> | <b><math>\gamma</math>(deg)</b> |
|----------------|-----------------------------|--------------|--------------|--------------|----------------------------------|---------------------------------|---------------------------------|
| -0.3337        | 494.9934                    | 11.5290      | 8.3901       | 5.5363       | 89.61                            | 112.43                          | 90.09                           |
| -0.2490        | 496.9889                    | 11.4381      | 8.5302       | 5.5466       | 89.59                            | 113.31                          | 90.10                           |
| -0.1664        | 498.5299                    | 11.3440      | 8.6679       | 5.5591       | 89.64                            | 114.21                          | 90.11                           |
| -0.0830        | 499.5203                    | 11.2490      | 8.7977       | 5.5751       | 89.72                            | 115.13                          | 90.10                           |
| 0.0007         | 501.3811                    | 11.1228      | 8.9756       | 5.6023       | 89.80                            | 116.30                          | 90.07                           |
| 0.0836         | 504.6081                    | 10.9101      | 9.2829       | 5.6382       | 89.80                            | 117.91                          | 90.09                           |
| 0.1240         | 506.1968                    | 10.8064      | 9.4183       | 5.6653       | 89.83                            | 118.61                          | 90.08                           |
| 0.1656         | 507.5263                    | 10.6219      | 9.6598       | 5.7034       | 89.92                            | 119.86                          | 90.07                           |
| 0.1900         | 506.8629                    | 10.5947      | 9.6910       | 5.7109       | 89.92                            | 120.18                          | 90.07                           |
| 0.2079         | 504.8509                    | 10.5625      | 9.7158       | 5.7203       | 89.93                            | 120.68                          | 90.07                           |
| 0.2496         | 503.0695                    | 10.4704      | 9.8136       | 5.7458       | 89.87                            | 121.56                          | 90.05                           |

**Table S7.** Calculated volumetric compressibilities ( $k_V = -1/V \cdot (\partial V/\partial P)_P$ ) of copper squarate for different external uniaxial stresses applied along the the direction of minimum compressibility.

| P (GPa) | $k_V(\text{TPa}^{-1})$ | P (GPa) | $k_V(\text{TPa}^{-1})$ |
|---------|------------------------|---------|------------------------|
| -0.30   | -50.38                 | 0.08    | -75.98                 |
| -0.27   | -55.53                 | 0.09    | -77.57                 |
| -0.24   | -49.01                 | 0.10    | -79.49                 |
| -0.21   | -38.20                 | 0.11    | -81.06                 |
| -0.18   | -28.23                 | 0.12    | -81.28                 |
| -0.15   | -22.25                 | 0.13    | -78.74                 |
| -0.12   | -21.78                 | 0.14    | -71.63                 |
| -0.09   | -26.95                 | 0.15    | -57.66                 |
| -0.06   | -36.82                 | 0.16    | -34.02                 |
| -0.03   | -49.61                 | 0.17    | 2.65                   |
| 0.00    | -63.04                 | 0.18    | 56.36                  |
| 0.03    | -74.58                 | 0.19    | 131.85                 |
| 0.06    | -75.07                 | 0.20    | 234.70                 |
| 0.07    | -75.11                 | -       | -                      |

## Reference

1. Dinnebier R.E.; Nuss H.; Jansen, M. Anhydrous  $\text{CuC}_4\text{O}_4$ , a Channel Structure solved from X-ray Powder Diffraction Data. *Z. Anorg. Allg. Chem.* **2005**, 63, 2328–2332.
